# Supplementary material
Source: HighWire-hosted journal article supplement (https://cmaj.ca/highwire/filestream/58714/field_highwire_adjunct_files/0/suicide-katz-1-at.pdf)
Supplement: suicide-katz-1-at.pdf [file suicide-katz-1-at.pdf]

Appendix 1 (as supplied by the authors): Sample of suicide attempts and person-years at risk by 4 different strata<sup>a</sup>

| Sex    | In care status | SES | Age group, yr | Psychiatric disorder | Parental psychopathology | Suicide attempts | Person-years at risk |
|--------|----------------|-----|---------------|----------------------|--------------------------|------------------|----------------------|
| Male   | No             | R1  | 12-17         | Yes                  | Yes                      | 143              | 11976.24             |
| Male   | No             | R1  | 12-17         | No                   | Yes                      | 53               | 55360.73             |
| Female | No             | R1  | 12-17         | Yes                  | Yes                      | 303              | 15595.14             |
| Female | No             | R1  | 12-17         | No                   | Yes                      | 131              | 48492.05             |

R1= lowest rural household income quintile, SES = socioeconomic status.

<sup>a</sup> e.g., Row 1 is one stratum that was created and shows the suicide attempts and person-years at risk for 12-17 year-old males from the lowest rural household income quintile, who were not in care, and who had a psychiatric disorder and a parent who had a psychiatric disorder.
